# Supplementary material
Source: MDPI journal article supplement (https://www.mdpi.com/2071-1050/16/9/3513)
Supplement: s1 [file s1]

**Supplementary material - Table S1.** Search strategies

| Database | Search string                                                                                                                                                                                                                                                                                                                                                                                                                                                                                                           | Number of records |
|----------|-------------------------------------------------------------------------------------------------------------------------------------------------------------------------------------------------------------------------------------------------------------------------------------------------------------------------------------------------------------------------------------------------------------------------------------------------------------------------------------------------------------------------|-------------------|
| PubMed   | ((Waste[Title] OR disposal[Title]) AND (healthcare[Title] OR (health[Title] AND care[Title]) OR health-care[Title] OR medical[Title] OR hospital[Title] OR pharmaceutical[Title] OR infectious[Title] OR biomedical[Title] OR medication[Title] OR laboratory[Title] OR pen*[Title] OR needle[Title] OR bio-medical[Title] OR clinical[Title])) AND (train*[Title/Abstract] OR teach*[Title/Abstract] OR project[Title/Abstract] OR course[Title/Abstract] OR education[Title/Abstract] OR educational[Title/Abstract]) | 369               |
| Embase   | ('hospital waste'/exp OR 'hospital waste') AND ('health care personnel'/exp OR 'health care personnel') AND 'education'/exp                                                                                                                                                                                                                                                                                                                                                                                             | 166               |
| CINAHL   | TI ( waste OR disposal ) AND TI ( healthcare OR ( health AND care ) OR health-care OR medical OR hospital OR pharmaceutical OR infectious OR biomedical OR medication OR laboratory OR pen* OR needle OR bio-medical OR clinical ) AND TI ( train* OR teach* OR project OR course OR education OR educational )                                                                                                                                                                                                         | 42                |
| Cochrane | TI,AB,KW "medical waste" OR "hospital waste"                                                                                                                                                                                                                                                                                                                                                                                                                                                                            | 30                |
| WoS      | TS= (("medical waste" OR "hospital waste") AND TS=(( "healthcare" OR ("health" AND "care") OR "health-care" OR "medical" OR "hospital" OR "pharmaceutical" OR "infectious" OR "biomedical" OR "medication" OR "laboratory" OR "pen*" OR "needle" OR "bio-medical" OR "clinical"))) AND TS=("education"))                                                                                                                                                                                                                | 94                |
| Scopus   | TITLE ( waste OR disposal ) AND TITLE (healthcare OR (health AND care) OR healthcare OR medical OR hospital OR pharmaceutical OR infectious OR biomedical OR medication OR laboratory OR pen* OR needle OR biomedical OR clinical ) AND TITLE (train* OR teach* OR project OR course OR education OR educational )                                                                                                                                                                                                      | 138               |

Limitations: Published from inception to 30-09-2022
