# Supplementary material
Source: MDPI journal article supplement (https://www.mdpi.com/2071-1050/16/9/3513)
Supplement: s1 [file s1]

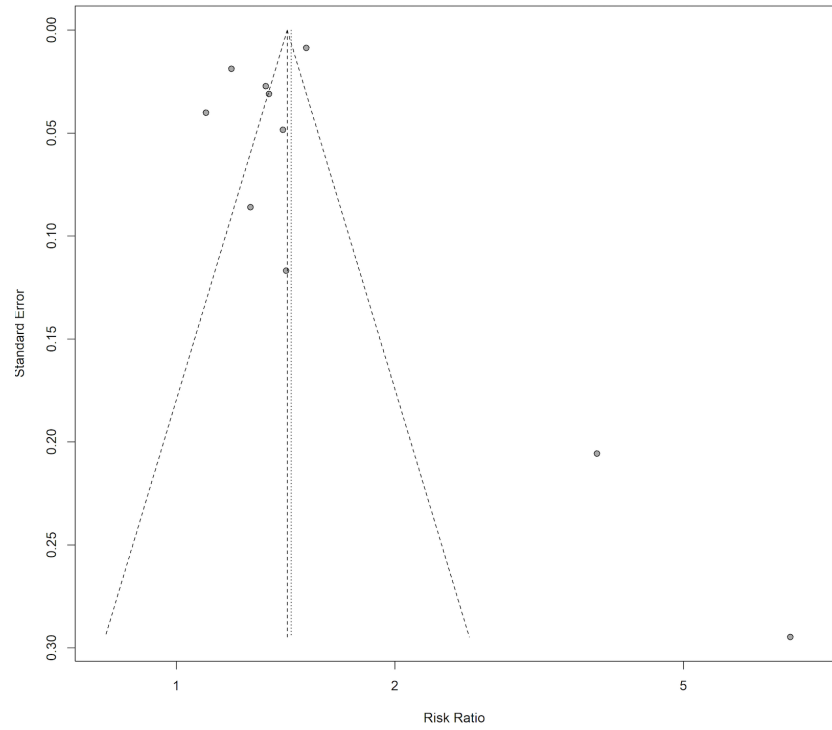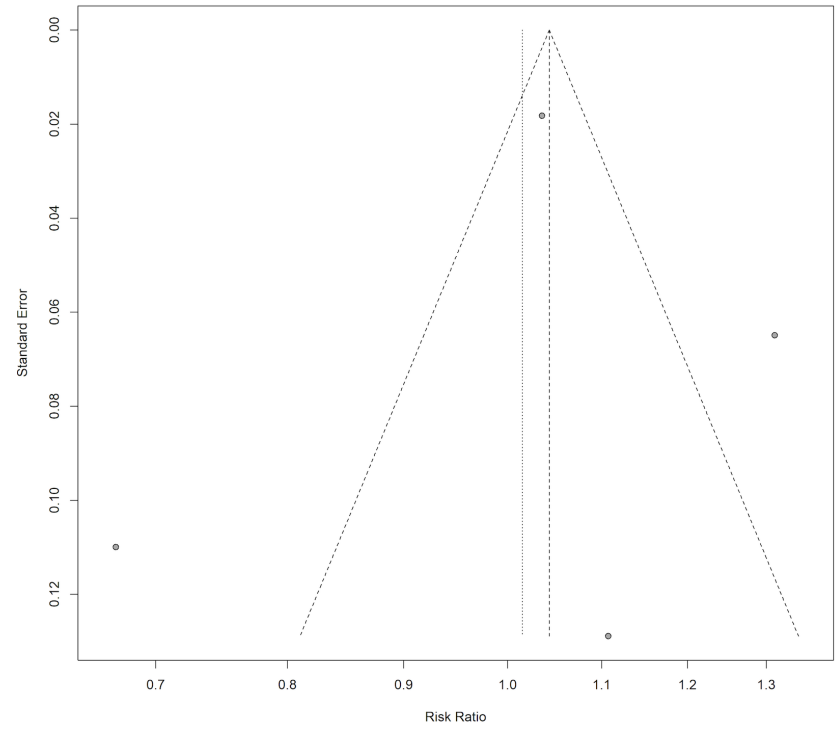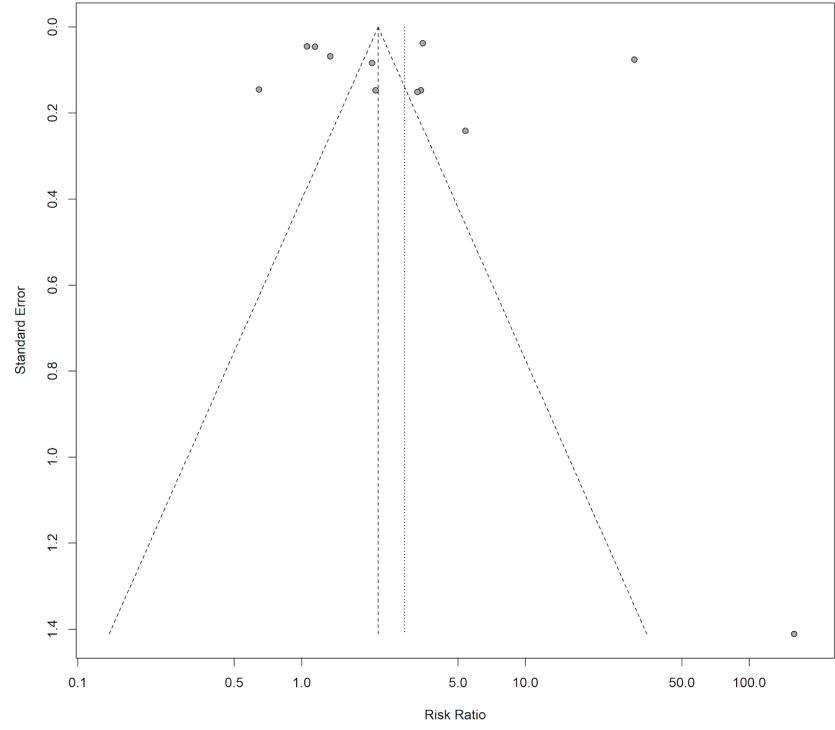

**Supplementary Material – Figure S6:** Funnel plots for the knowledge (left), attitudes (middle), and practices (right) domains
