# Supplementary material
Source: MDPI journal article supplement (https://www.mdpi.com/2071-1050/16/9/3513)
Supplement: s1 [file s1]

| Supplementary material – Table S3: Quality appraisal |                   |                 |                |             |                            |                              |                            |              |                  |
|------------------------------------------------------|-------------------|-----------------|----------------|-------------|----------------------------|------------------------------|----------------------------|--------------|------------------|
|                                                      | Q1-Selection bias | Q2-Study design | Q3-Confounders | Q4-Blinding | Q5-Data collection methods | Q6-Withdrawals and drop-outs | Q7-Intervention integrity* | Q8-Analyses* | Q9-Global rating |
| Abdo et al. 2019                                     | Strong            | Weak            | Moderate       | Moderate    | Moderate                   | Strong                       | Moderate                   | Moderate     | Moderate         |
| Ahmed et al. 2018                                    | Strong            | Moderate        | Moderate       | Moderate    | Weak                       | Moderate                     | Moderate                   | Moderate     | Moderate         |
| Ara et al. 2015                                      | Weak              | Moderate        | Weak           | Moderate    | Moderate                   | Weak                         | Moderate                   | Weak         | Weak             |
| Ara et al. 2022                                      | Moderate          | Moderate        | Weak           | Moderate    | Moderate                   | Weak                         | Moderate                   | Moderate     | Weak             |
| El-Gilany et al. 2017                                | Moderate          | Strong          | Moderate       | Moderate    | Moderate                   | Moderate                     | Moderate                   | Moderate     | Strong           |
| Elnour et al. 2015                                   | Strong            | Moderate        | Strong         | Moderate    | Moderate                   | Moderate                     | Moderate                   | Strong       | Strong           |
| Fraifeld et al. 2021                                 | Weak              | Moderate        | Weak           | Moderate    | Weak                       | Moderate                     | Moderate                   | Strong       | Weak             |
| Hosny et al. 2018                                    | Moderate          | Moderate        | Weak           | Moderate    | Moderate                   | Moderate                     | Moderate                   | Moderate     | Moderate         |
| Jarvis et al. 2009                                   | Moderate          | Moderate        | Weak           | Moderate    | Weak                       | Moderate                     | Weak                       | Moderate     | Weak             |
| Johnson et al. 2013                                  | Weak              | Moderate        | Moderate       | Moderate    | Moderate                   | Moderate                     | Moderate                   | Moderate     | Moderate         |
| Joseph et al. 2015                                   | Moderate          | Moderate        | Moderate       | Moderate    | Moderate                   | Weak                         | Moderate                   | Moderate     | Moderate         |
| Krishnan et al. 2015                                 | Moderate          | Moderate        | Moderate       | Moderate    | Moderate                   | Weak                         | Moderate                   | Moderate     | Moderate         |
| Kumar et al. 2015                                    | Moderate          | Moderate        | Moderate       | Moderate    | Moderate                   | Moderate                     | Strong                     | Moderate     | Strong           |
| Kumar et al. 2016                                    | Weak              | Moderate        | Weak           | Moderate    | Weak                       | Moderate                     | Strong                     | Moderate     | Weak             |

|                                                       |          |          |          |          |          |          |          |          |          |
|-------------------------------------------------------|----------|----------|----------|----------|----------|----------|----------|----------|----------|
| Kumar et al. 2016b                                    | Moderate | Moderate | Moderate | Moderate | Weak     | Moderate | Moderate | Moderate | Moderate |
| Ozder et al. 2010                                     | Strong   | Moderate | Moderate | Moderate | Weak     | Moderate | Moderate | Moderate | Moderate |
| Robat et al. 2022                                     | Strong   | Strong   | Moderate | Moderate | Strong   | Moderate | Moderate | Moderate | Strong   |
| Rohilla et al. 2014                                   | Moderate | Moderate | Moderate | Moderate | Weak     | Moderate | Moderate | Moderate | Moderate |
| Sapkota et al. 2014                                   | Moderate | Moderate | Moderate | Moderate | Strong   | Moderate | Moderate | Moderate | Strong   |
| Shaheen et al. 2020                                   | Moderate | Moderate | Moderate | Moderate | Weak     | Moderate | Moderate | Moderate | Moderate |
| Singh et al. 2020                                     | Weak     | Moderate | Moderate | Moderate | Weak     | Moderate | Moderate | Moderate | Weak     |
| Tabash et al. 2016                                    | Moderate | Moderate | Moderate | Moderate | Weak     | Strong   | Moderate | Moderate | Moderate |
| Tabrizi et al. 2019                                   | Strong   | Moderate | Strong   |
| Wu et al. 2019                                        | Moderate | Moderate | Moderate | Moderate | Weak     | Moderate | Moderate | Moderate | Moderate |
| *These items were not considered in the global rating |          |          |          |          |          |          |          |          |          |
