# Supplementary material
Source: MDPI journal article supplement (https://www.mdpi.com/2071-1050/16/9/3513)
Supplement: s1 [file s1]

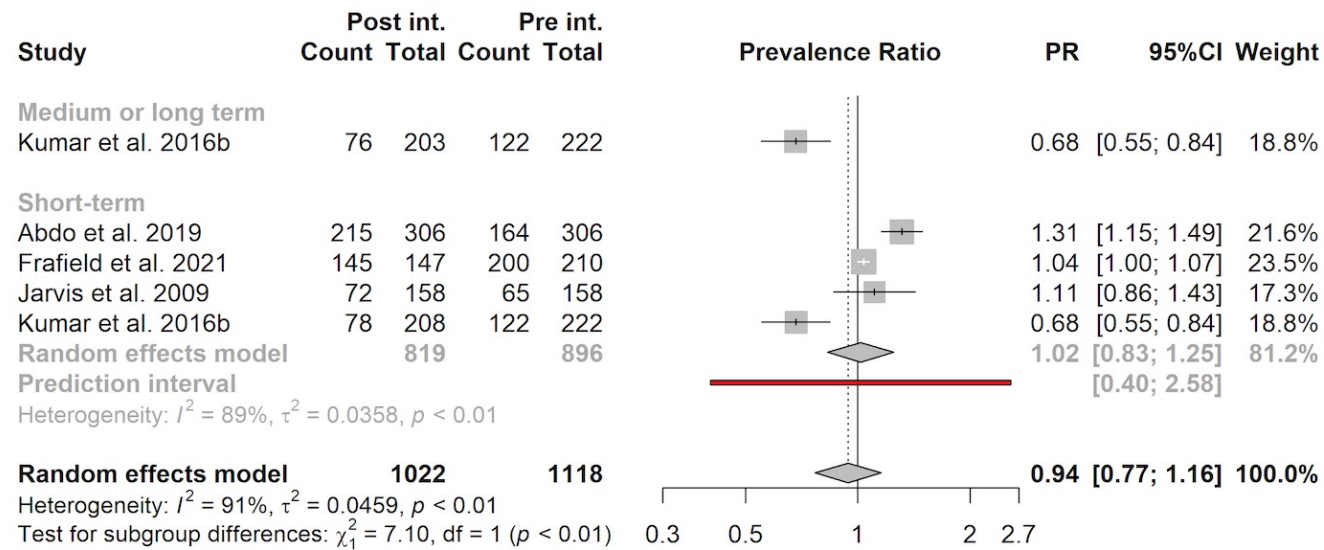

**Supplementary Material – Figure S5:** Forest plot of the subgroup meta-analysis for the effectiveness of medium or long term and short-term educational interventions in the attitudes domain. PR= prevalence ratio
