# Supplementary material
Source: MDPI journal article supplement (https://www.mdpi.com/2071-1050/16/9/3513)
Supplement: s1 [file s1]

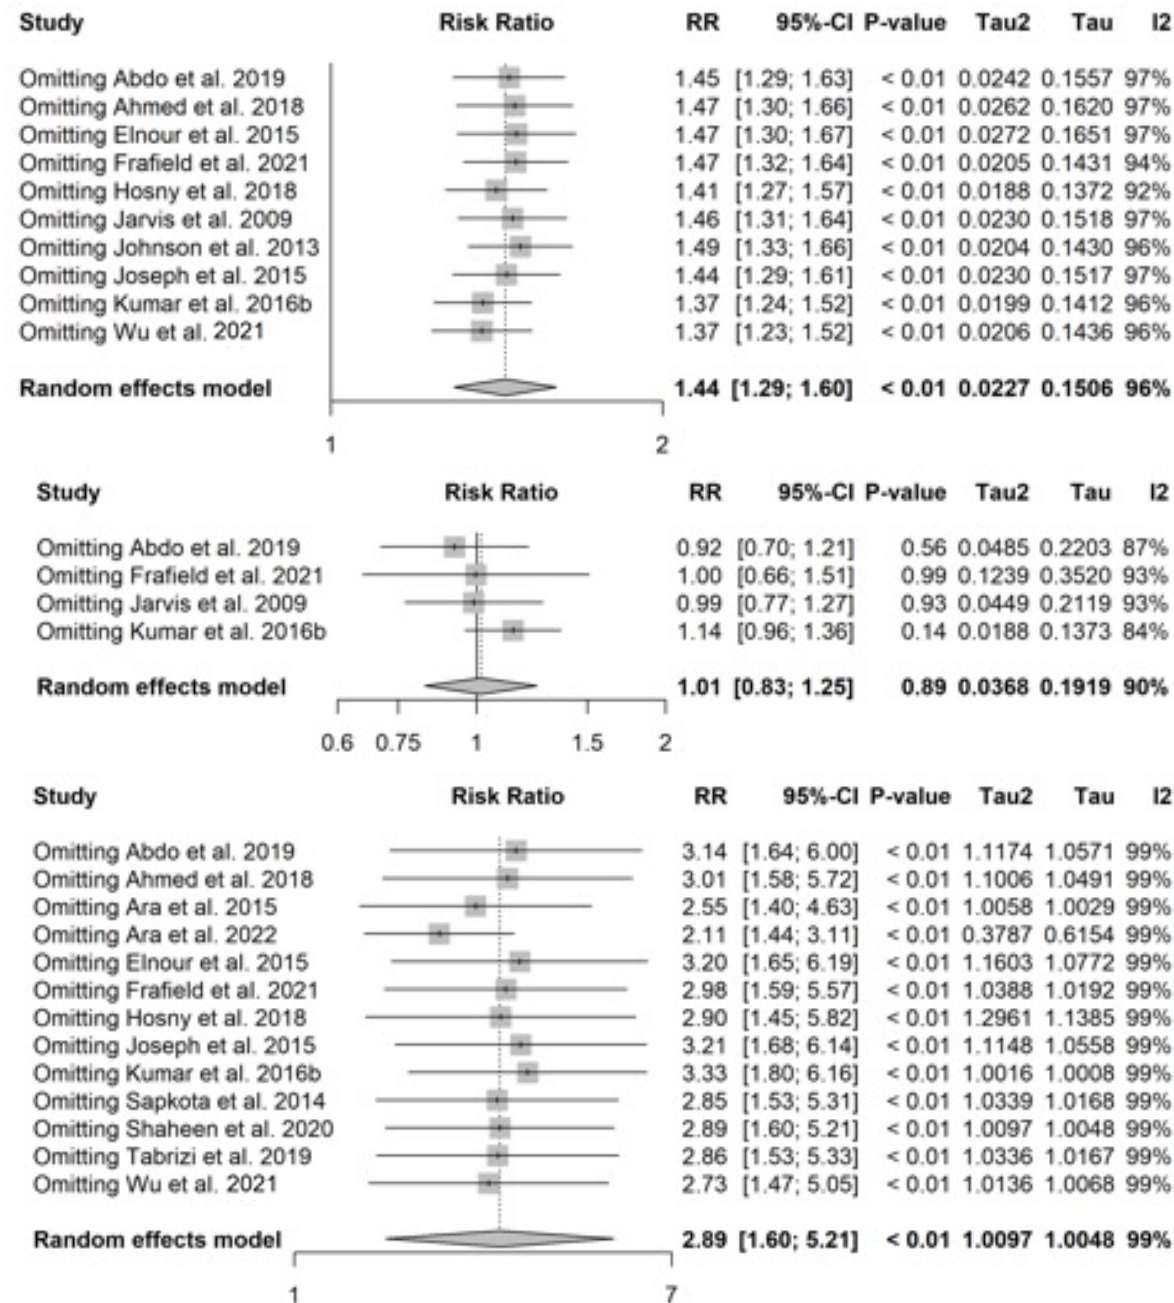

Supplementary Material – Figure S7: Leave-one-out analyses for the knowledge (top), attitudes (medium), and practices (down) domains
