# Supplementary material
Source: MDPI journal article supplement (https://www.mdpi.com/2071-1050/16/9/3513)
Supplement: s1 [file s1]

**Supplementary material - Table S4:** Level of significance of the Eggers' test

| Domain    | p     |
|-----------|-------|
| Knowledge | 0.711 |
| Practice  | 0.639 |
| Attitude  | 0.944 |
