# Supplementary material
Source: MDPI journal article supplement (https://www.mdpi.com/2071-1050/16/9/3513)
Supplement: s1 [file s1]

| Supplementary material - Table S2: Papers excluded at the full text level with reasons |                                                                                                                                                                                                                                                                                                                                                                                                                                                                                                                                                                                                                                                                                                                                                                                                                                                                                                                                                                                                                                                                                                                                                                     |
|----------------------------------------------------------------------------------------|---------------------------------------------------------------------------------------------------------------------------------------------------------------------------------------------------------------------------------------------------------------------------------------------------------------------------------------------------------------------------------------------------------------------------------------------------------------------------------------------------------------------------------------------------------------------------------------------------------------------------------------------------------------------------------------------------------------------------------------------------------------------------------------------------------------------------------------------------------------------------------------------------------------------------------------------------------------------------------------------------------------------------------------------------------------------------------------------------------------------------------------------------------------------|
| Reason for exclusion                                                                   | Paper                                                                                                                                                                                                                                                                                                                                                                                                                                                                                                                                                                                                                                                                                                                                                                                                                                                                                                                                                                                                                                                                                                                                                               |
| Without the provision of an educational intervention                                   | - Sengodan VC. Segregation of biomedical waste in an South Indian tertiary care hospital. J Nat Sci Biol Med. 2014; 5(2):378-82. doi: 10.4103/0976-9668.136194.                                                                                                                                                                                                                                                                                                                                                                                                                                                                                                                                                                                                                                                                                                                                                                                                                                                                                                                                                                                                     |
| Published in other languages                                                           | - Shien M, Chang C, Li M, Lin J. Decreasing the output of biomedical waste in the intensive care unit. Journal of Nursing. 2017; 64(5): 81-90. doi: doi.org/10.6224/JN.000071.                                                                                                                                                                                                                                                                                                                                                                                                                                                                                                                                                                                                                                                                                                                                                                                                                                                                                                                                                                                      |
| Study protocol                                                                         | - Vaishnav LM, Mehendale A. Effectiveness of training program on awareness among nursing staff, lab technicians and sanitary workers regarding bio-medical waste management in a Tertiary Care Hospital in central India. European Journal of Molecular & Clinica. 2020; 7(7):2066-2074.                                                                                                                                                                                                                                                                                                                                                                                                                                                                                                                                                                                                                                                                                                                                                                                                                                                                            |
| Weight is the outcome used to assess the effectiveness of educational interventions    | - Askarian M, Heidarpour P, Assadian O. A total quality management approach to healthcare waste management in Namazi Hospital, Iran. Waste Manag. 2010;30(11):2321-6. doi: 10.1016/j.wasman.2010.06.020.<br>- Cesario FKO, Fontoura RP, da Conceição Junior AH, Cruz AG, Nimer NFS, Morais PB, Omena BM, Dos Santos EB, Silvestrini AA, Andrade RV. Reduction of Management Costs and Avoidance of Air Release of Carcinogens Through a Waste Segregation Program in a Brazilian Medical Institution. Front Public Health. 2020 7;8:583962. doi: 10.3389/fpubh.2020.583962.<br>- Conrardy J, Hillanbrand M, Myers S, Nussbaum GF. Reducing medical waste. AORN Journ. 2010; 91(6): 711-721.<br>- Moreira AM, Günther WM. Assessment of medical waste management at a primary health-care center in São Paulo, Brazil. Waste Manag. 2013; 33(1):162-7. doi: 10.1016/j.wasman.2012.09.018.<br>- Mosquera M, Andrés-Prado MJ, Rodríguez-Caravaca G, Latasa P, Mosquera ME. Evaluation of an education and training intervention to reduce health care waste in a tertiary hospital in Spain. Am J Infect Control. 2014; 42(8): 894-7. doi: 10.1016/j.ajic.2014.04.013. |
| Not possible to extract specific data about the phenomenon of interest                 | - Goyal M, Bansal M, Bajpai A, Siddique A, Srivastava RK. Impact of Educational Intervention on the Awareness of Disposal of Leftover/Expired Medicines among Health care Professionals. Journal of Pharmacology and Pharmacotherapeutics. 2018; 9(2): 113-116.<br>- Moreira AM, Günther WM. Healthcare Waste Management in a Brazilian Higher Education and Health Research Institution. In: Leal Filho, W., Bardi, U. (eds) Sustainability on University Campuses: Learning, Skills Building and Best Practices. World Sustainability Series. Springer, Cham. 2019.<br>- Sirvastava DK, Bansal M, Gour N, Choudhary P, Jain PK, Chouksey M, Pathak P. A study of the impact of three day training programme on knowledge regarding bio-medical waste among paramedical staff of District hospital Etawah. Indian Journal of Community Health. 2013; 25(3): 272-276.                                                                                                                                                                                                                                                                                               |
